# Instructions for Obtaining ANESTHESIOLOGY Continuing Medical Education (CME) Credit

CME Editors: Leslie C. Jameson, M.D., and Dan J. Kopacz, M.D.

ANESTHESIOLOGY's Journal CME is open to all readers. Members of the American Society of Anesthesiologists (ASA) enjoy a preferred rate for their subscription. However, Journal CME is not limited to ASA members or Journal subscribers. To take part in Journal CME, complete the following steps:

1. For the article listed on the right, read the learning objectives and disclosure information.
2. Read the article in the print or online edition.
3. Register at <http://education.asahq.org/2012-journal-cme> and provide payment.
4. Once online, complete the questions and other required information for the CME program, including the evaluation.

The American Society of Anesthesiologists is accredited by the Accreditation Council for Continuing Medical Education to provide continuing medical education for physicians.

The American Society of Anesthesiologists designates this journal-based CME activity for a maximum of 1 *AMA PRA Category 1 Credit(s)*<sup>TM</sup>. Physicians should claim only the credit commensurate with the extent of their participation in the activity.

**Purpose:** The focus of ANESTHESIOLOGY Journal CME is to educate readers on current developments in the science and clinical practice of anesthesiology.

**Target Audience:** ANESTHESIOLOGY Journal CME is intended for anesthesiologists. Researchers and other health care professionals with an interest in anesthesiology may also participate.

## Claiming Credit

All tests and requests for credit must be submitted through the ANESTHESIOLOGY CME website at <http://education.asahq.org/2012-journal-cme>. Participants should claim credit in 15-minute increments, for a maximum of 1 *AMA PRA Category 1 Credit(s)*<sup>TM</sup> per journal article.

Two payment options are available:

|            | ASA Member | Non-member |
|------------|------------|------------|
| Annual Fee | \$60       | \$120      |
| Per Issue  | \$10       | \$20       |

Payment may be made using Visa or MasterCard.

Please direct any questions about Journal CME to:  
ASA Member Services  
(847) 825-5586

## This Month's ANESTHESIOLOGY Journal CME

Read the article by Mashour *et al.* entitled "Prevention of intraoperative awareness with explicit recall in an unselected surgical pop-

ulation: A randomized comparative effectiveness trial" on page 717 and the accompanying editorial by Memtsoudis and Liu entitled "Bispectral index *versus* minimum alveolar concentration for prevention of intraoperative awareness: Does a practical controlled trial provide CERtainty?" on page 693 of this issue.

## Learning Objectives

After completing this activity, the learner will be able to evaluate research conclusions based on comparative effectiveness research, employ alert or alarm interventions to reduce patient awareness, and use minimum alveolar concentration-based or Bispectral Index-directed care to enhance medical management.

## Authors Disclosures

**Authors:** George A. Mashour, M.D., Ph.D., Amy Shanks, M.S., Kevin K. Tremper, Ph.D., M.D., Sachin Kheterpal, M.D., M.B.A., Christopher R. Turner, M.D., Ph.D., M.B.A., Satya Krishna Ramachandran, M.D., F.R.C.A., Paul Picton, M.D., F.R.C.A., Christa Schueller, B.S., Michelle Morris, M.S., John C. Vandervest, B.S., Nan Lin, Ph.D., and Michael S. Avidan, M.B.B.Ch., have no financial interest in or affiliation with any commercial supporter or providers of any commercial services discussed in this educational material.

**Authors:** Stavros G. Memtsoudis, M.D., Ph.D., F.C.C.P., and Spencer S. Liu, M.D., have no financial interest in or affiliation with any commercial supporter or providers of any commercial services discussed in this educational material.

## Journal CME Planning Participants Disclosures

**Editor-in-Chief:** James C. Eisenach, M.D., receives consulting fees from Adynxx and NeuroGesX.

**CME Editors:** Leslie C. Jameson, M.D., receives consulting fees and honoraria from Masimo and honoraria from GE Medical. Dan J. Kopacz, M.D., has no relevant financial relationships to disclose.

**ASA Staff:** Employees involved in planning have no relevant financial relationships to disclose.

## Expiration

Registration and submission of answers must be completed by October 31, 2015.
